# Supplementary material for: A novel tetranuclear Cu(ii) complex for DNA-binding and in vitro anticancer activity
Source: Royal Society of Chemistry journal article supplement (doi:10.1039/d3ra03624c), 2023-01-01
Supplement: d3ra03624c1.pdf [file d3ra03624c1.pdf]

## A Novel tetranuclear Cu (II) Complex for DNA-binding and in Vitro Anticancer Activity

Shuhua Cao<sup>a,\*</sup>, Anlin Wang<sup>b</sup>, Kaoxue Li<sup>a</sup>, Zhiteng Lin<sup>a</sup>, Hongwei Yang<sup>a</sup>, Xiaolei Zhang<sup>a</sup>, Jianmei Qiu<sup>a</sup>, Xishi Tai<sup>a,\*</sup>

<sup>a</sup>College of Chemistry, Chemical and Environmental Engineering, Weifang University, No. 5147 Dongfeng Street, Weifang, 261061, P. R. China. [shuhua@wfu.edu.cn](mailto:shuhua@wfu.edu.cn) [taixs@wfu.edu.cn](mailto:taixs@wfu.edu.cn)

<sup>b</sup>Affiliated Beijing Chaoyang Hospital, Capital Medical University, No. 8 Gongren Tiyuchang Nanlu, Chaoyang District, Beijing, 100020, P. R. China.

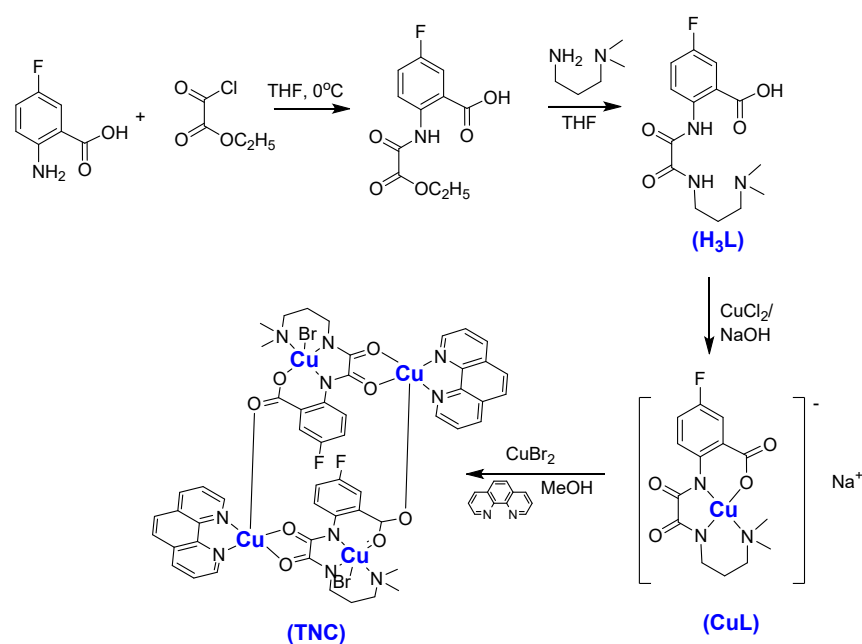

**Scheme 1s.** The synthetic routes for the mononuclear copper ligand and TNC.

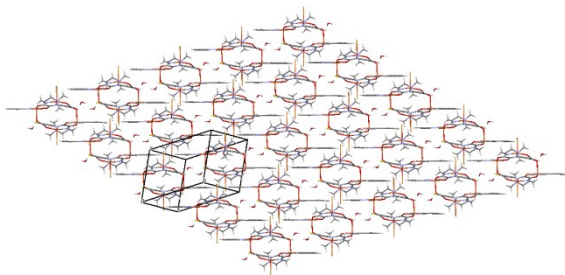

**Figure 1S.** The 3D supramolecular network for TNC

Table S1 Crystal data and structure refinement for TNC

|                                   |                                             |
|-----------------------------------|---------------------------------------------|
| Identification code               |                                             |
| Empirical formula                 | $C_{27} H_{29} Br Cu_2 F N_5 O_6$           |
| Formula weight                    | 745.54                                      |
| Temperature                       | 298(2) K                                    |
| Wavelength                        | 0.71073 Å                                   |
| Crystal system                    | Triclinic                                   |
| space group                       | P-1                                         |
| Unit cell dimensions              |                                             |
| a                                 | 10.8035(8) Å                                |
| b                                 | 12.1488(11) Å                               |
| c                                 | 12.9920(12) Å                               |
| alpha                             | 67.2590(10)deg.                             |
| beta                              | 69.516(2) deg.                              |
| gamma                             | 69.334(2) deg.                              |
| Volume                            | 1425.7(2) Å <sup>3</sup>                    |
| Z                                 | 2                                           |
| Calculated density                | 1.737 Mg/m <sup>3</sup>                     |
| Absorption coefficient            | 2.951 mm <sup>-1</sup>                      |
| F(000)                            | 752                                         |
| Crystal size                      | 0.37 x 0.23 x 0.02 mm                       |
| Theta range for data collection   | 2.43 to 25.02 deg.                          |
| Limiting indices                  | -12 ≤ h ≤ 9, -14 ≤ k ≤ 14, -15 ≤ l ≤ 12     |
| Reflections collected / unique    | 7311 / 4958 [R(int) = 0.0686]               |
| Completeness to theta = 25.02     | 98.3 %                                      |
| Absorption correction             | Semi-empirical from equivalents             |
| Max. and min. transmission        | 0.9516 and 0.4082                           |
| Refinement method                 | Full-matrix least-squares on F <sup>2</sup> |
| Data / restraints / parameters    | 4958 / 0 / 383                              |
| Goodness-of-fit on F <sup>2</sup> | 1.072                                       |
| Final R indices [I > 2σ(I)]       | R1 = 0.0656, wR2 = 0.1518                   |
| R indices (all data)              | R1 = 0.0980, wR2 = 0.1619                   |
| Largest diff. peak and hole       | 0.950 and -0.591 e.Å <sup>-3</sup>          |

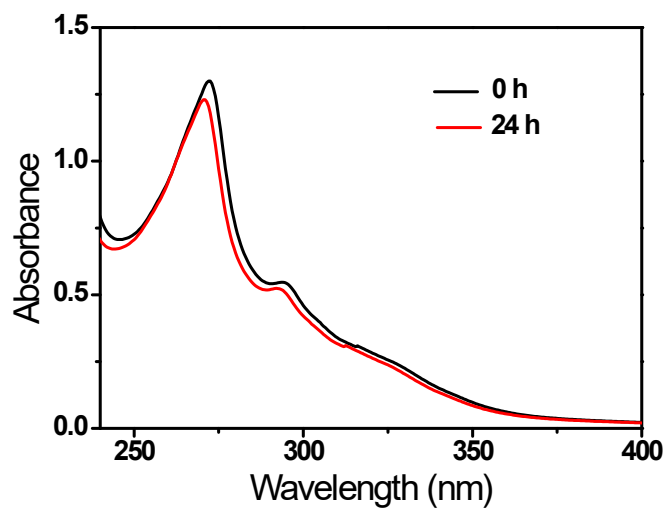

Figure 2S. The stability of TNC in aqueous media.

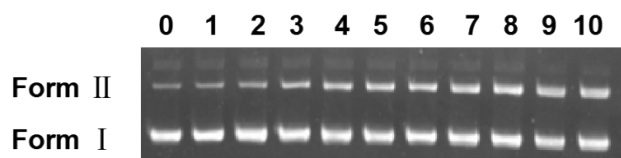

Figure 3S. Cleavage patterns of pUC19 DNA (20 ng/μl) by TNC in the agarose gel electrophoresis. Concentration of TNC: Lane 0: 0; Lane 1: 20 μM; Lane 2: 40 μM; Lane 3: 60 μM; Lane 4: 80 μM; Lane 5: 100 μM; Lane 6: 120 μM; Lane 7: 140 μM; Lane 8: 160 μM; Lane 9: 180 μM; Lane 10: 200 μM.
